# Supplementary material
Source: PubMed Central journal article supplement (PMC3985399)

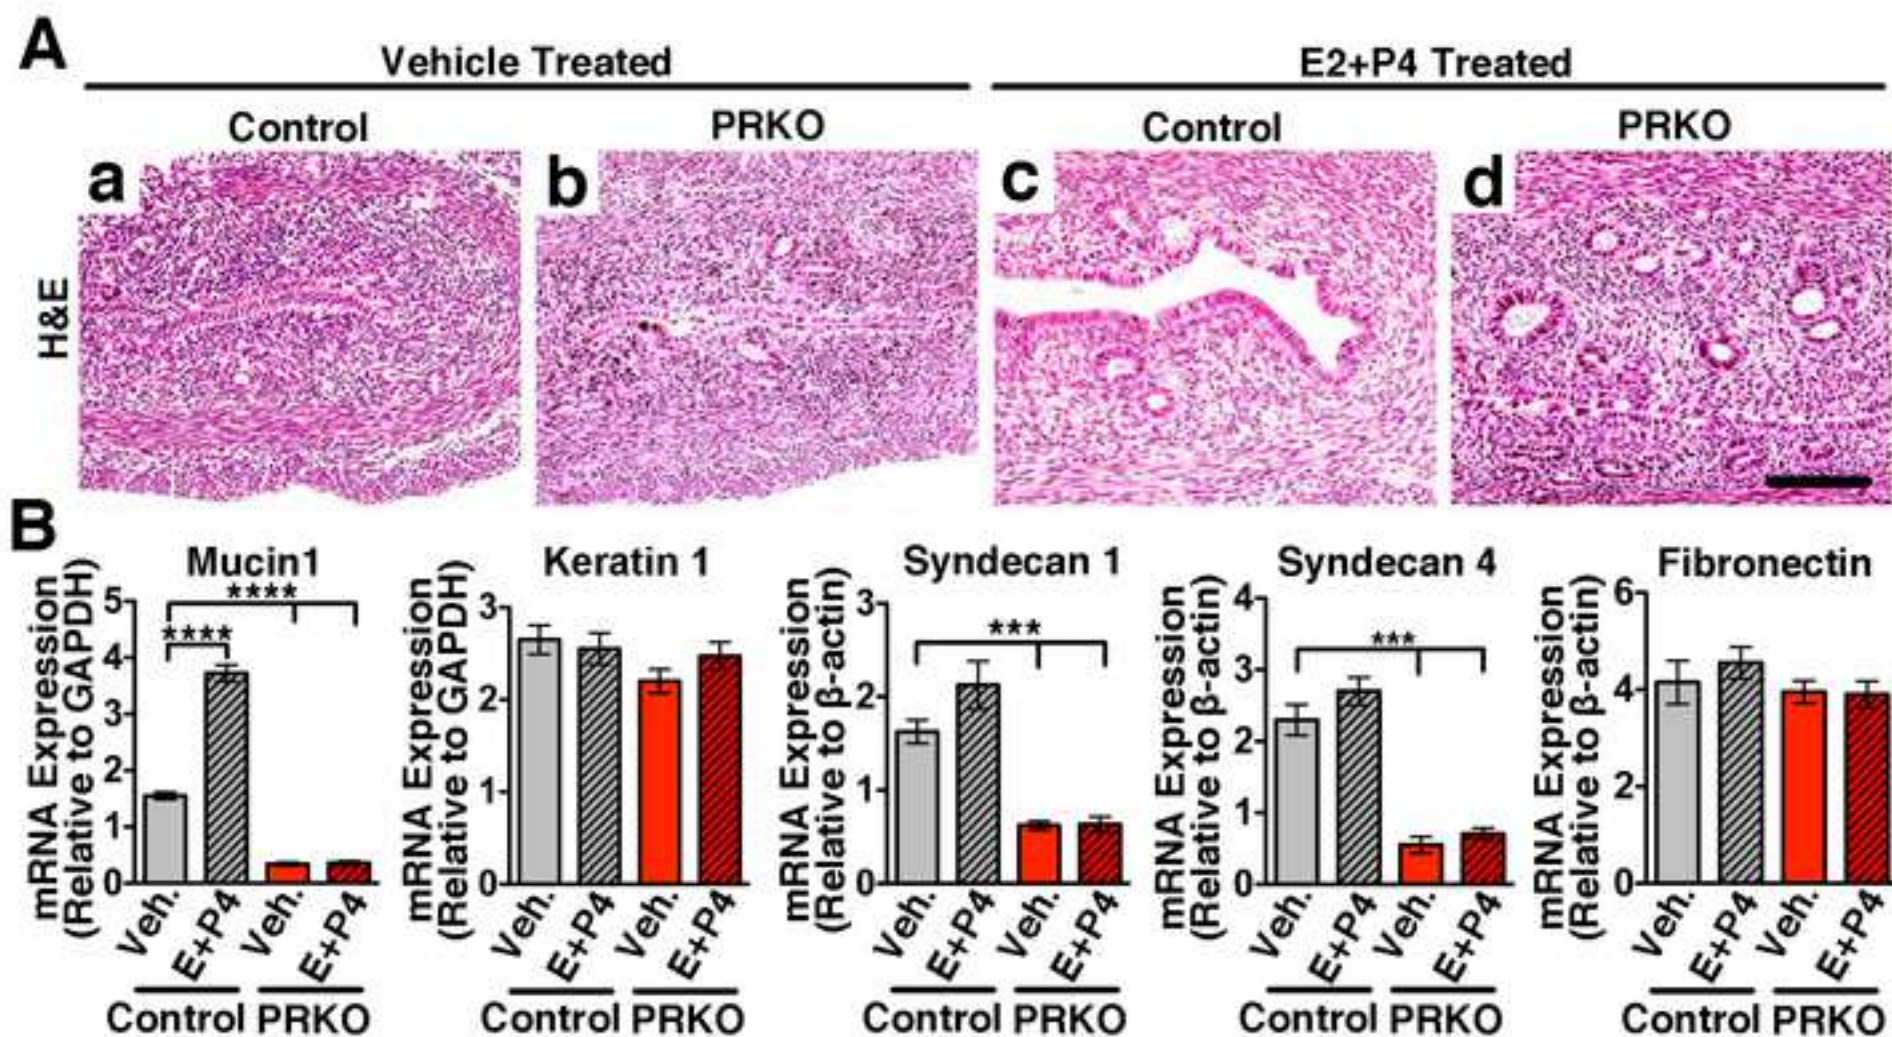

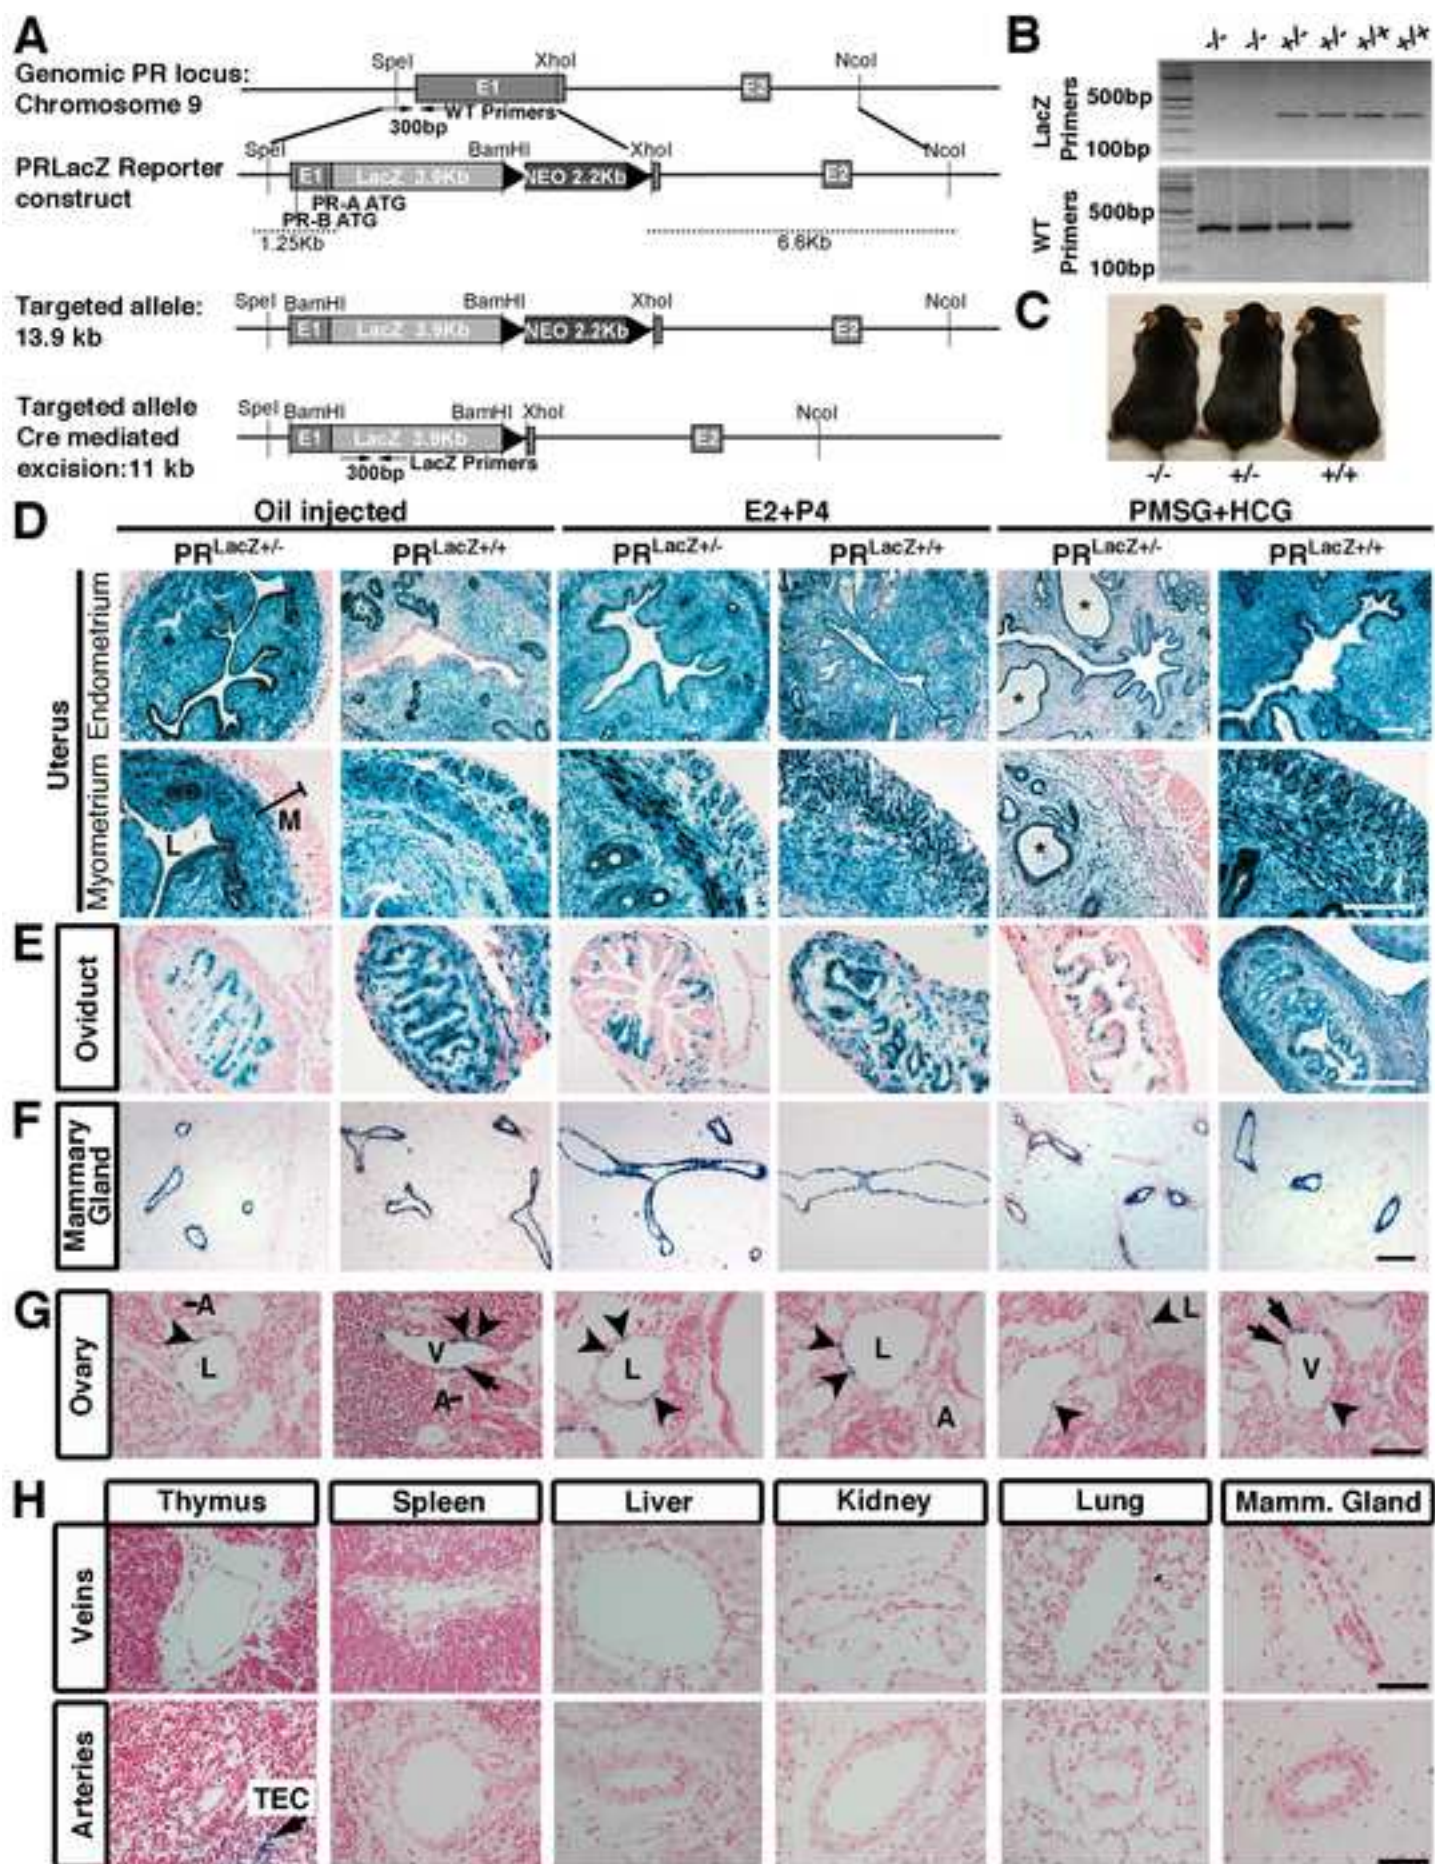

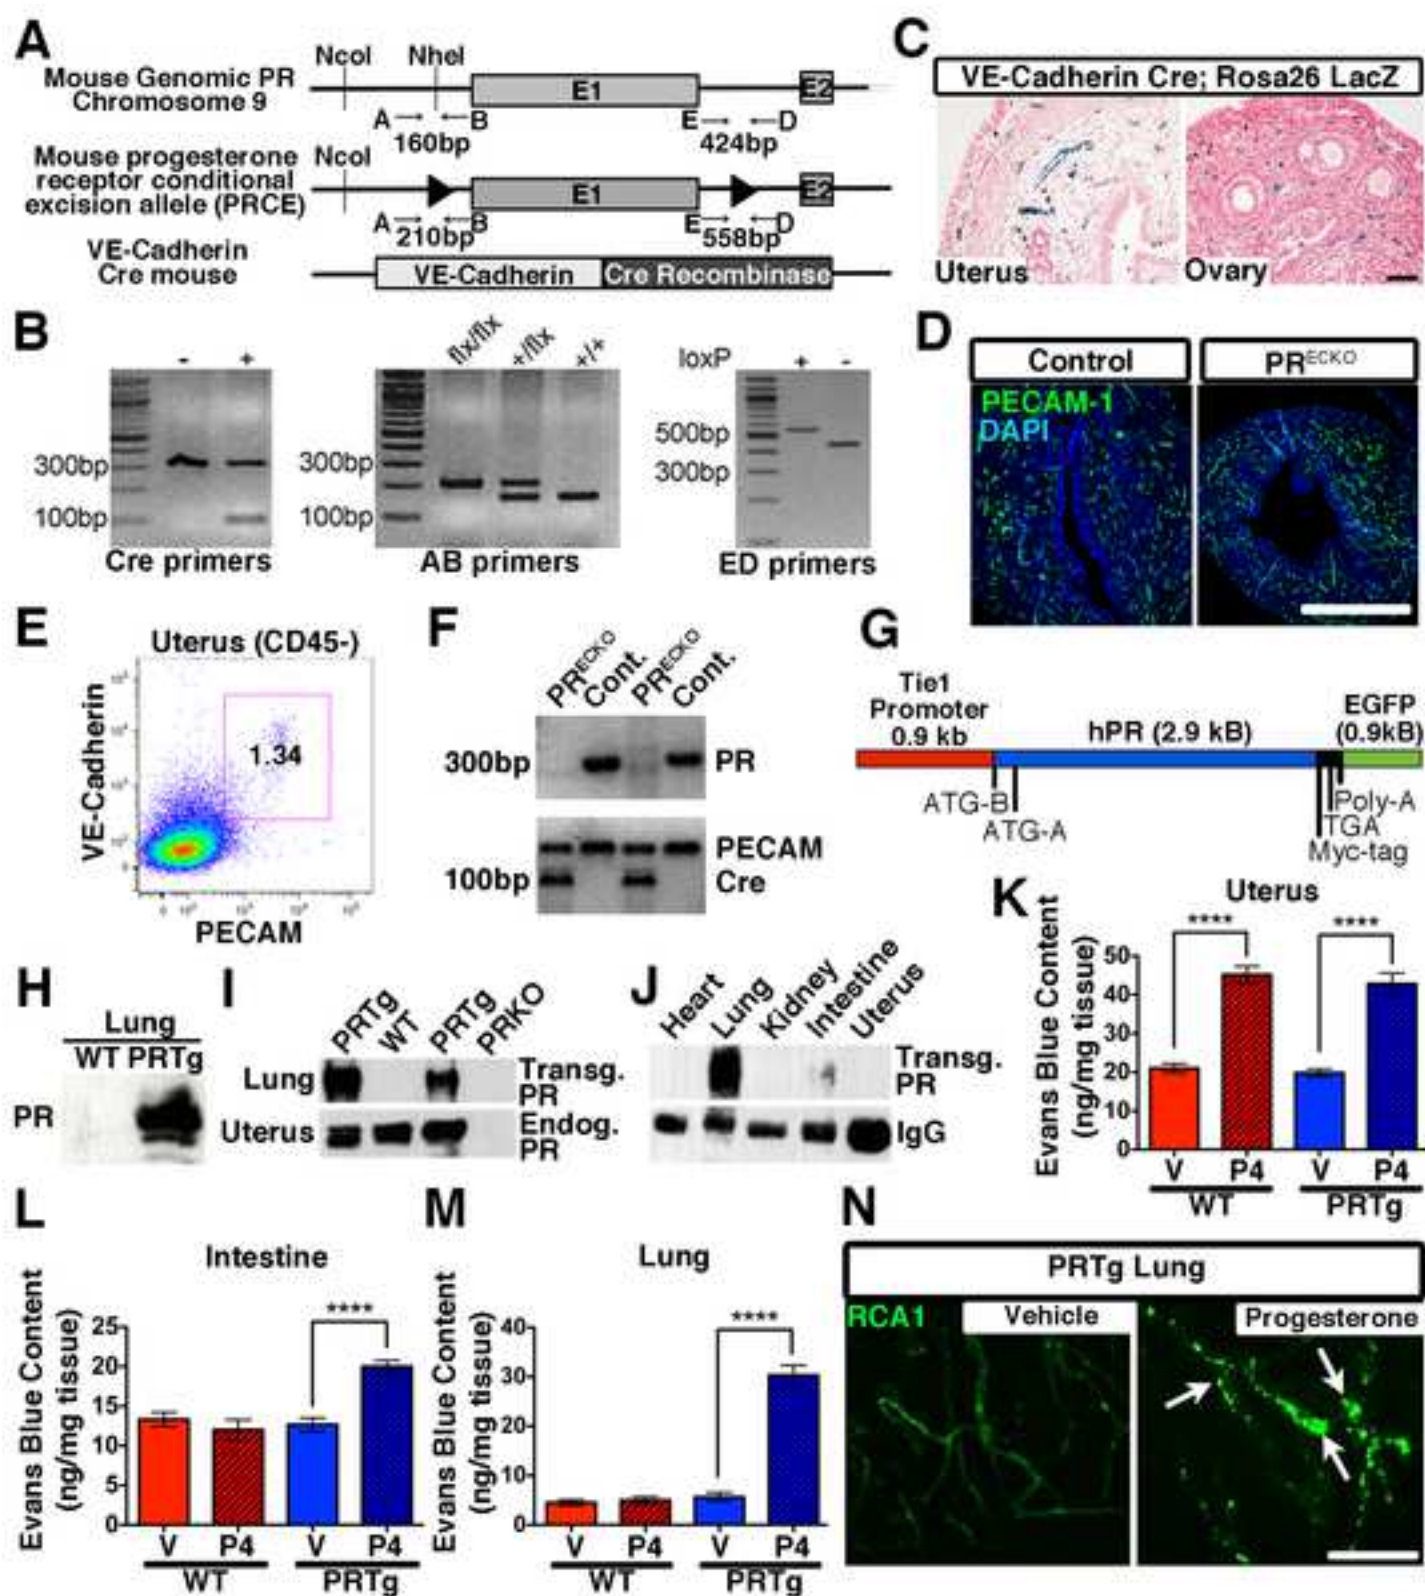

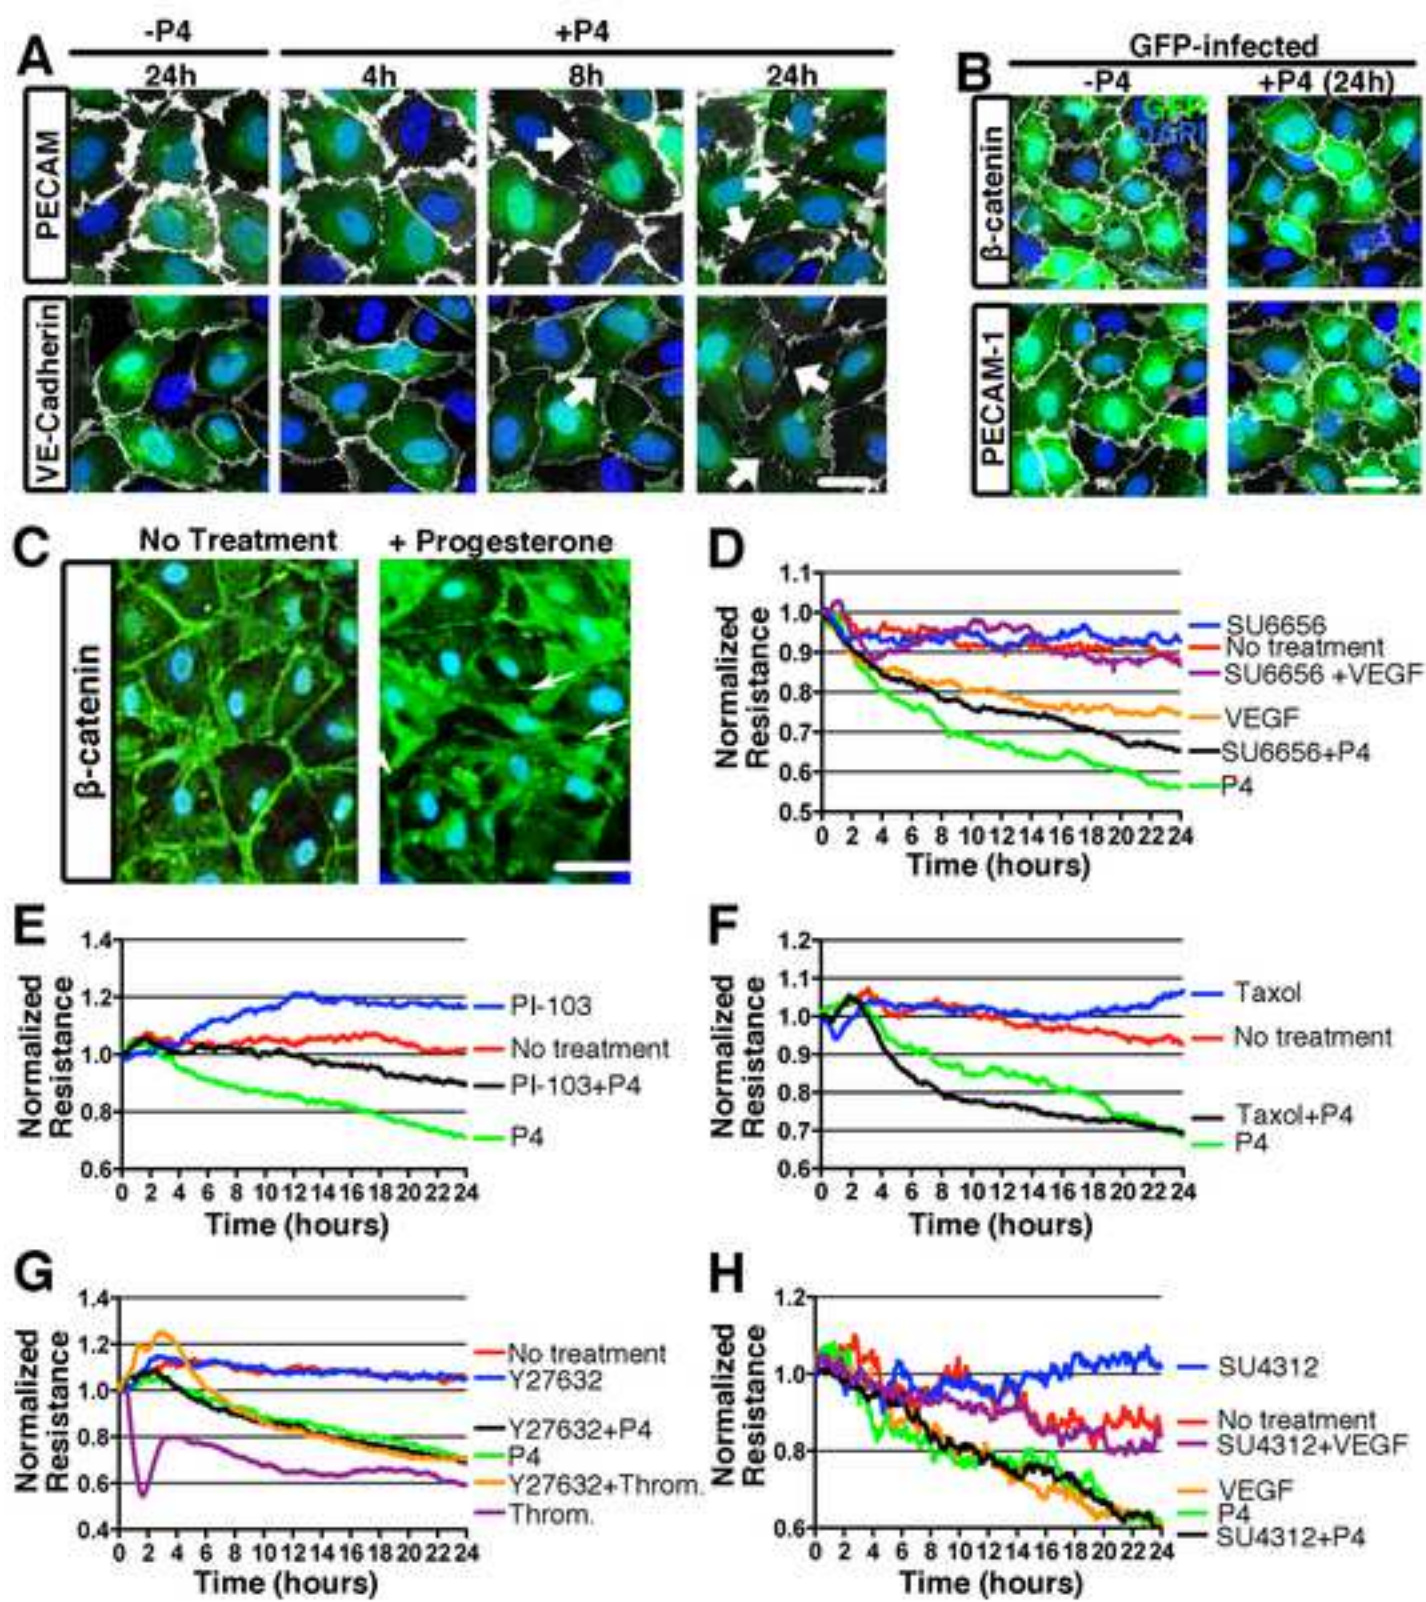

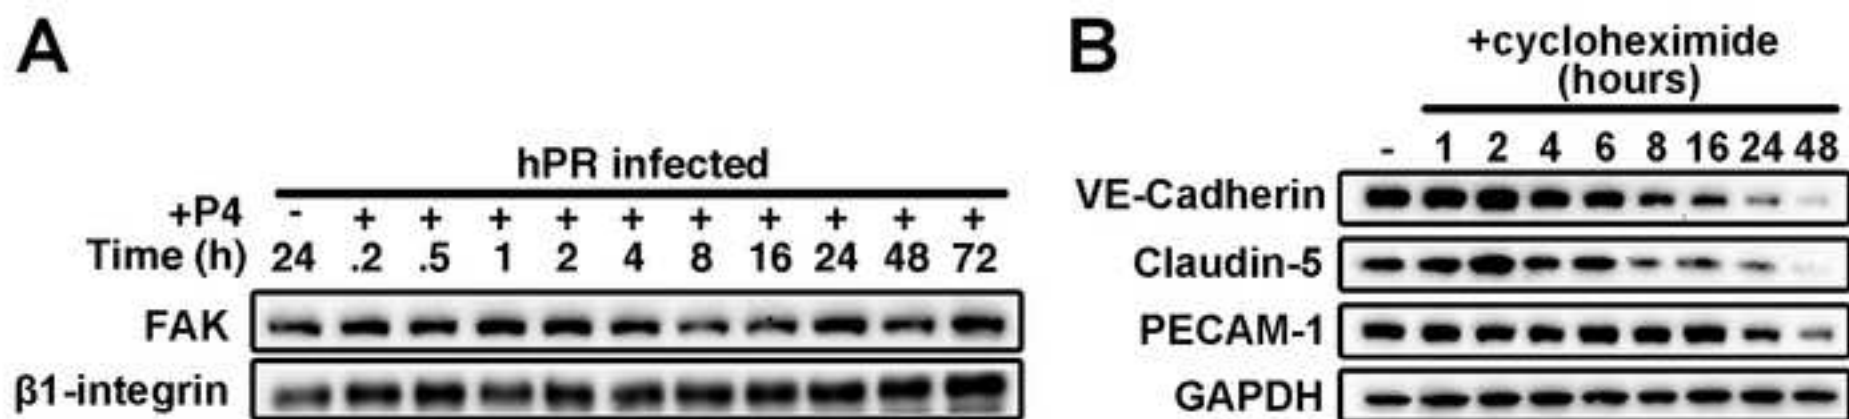

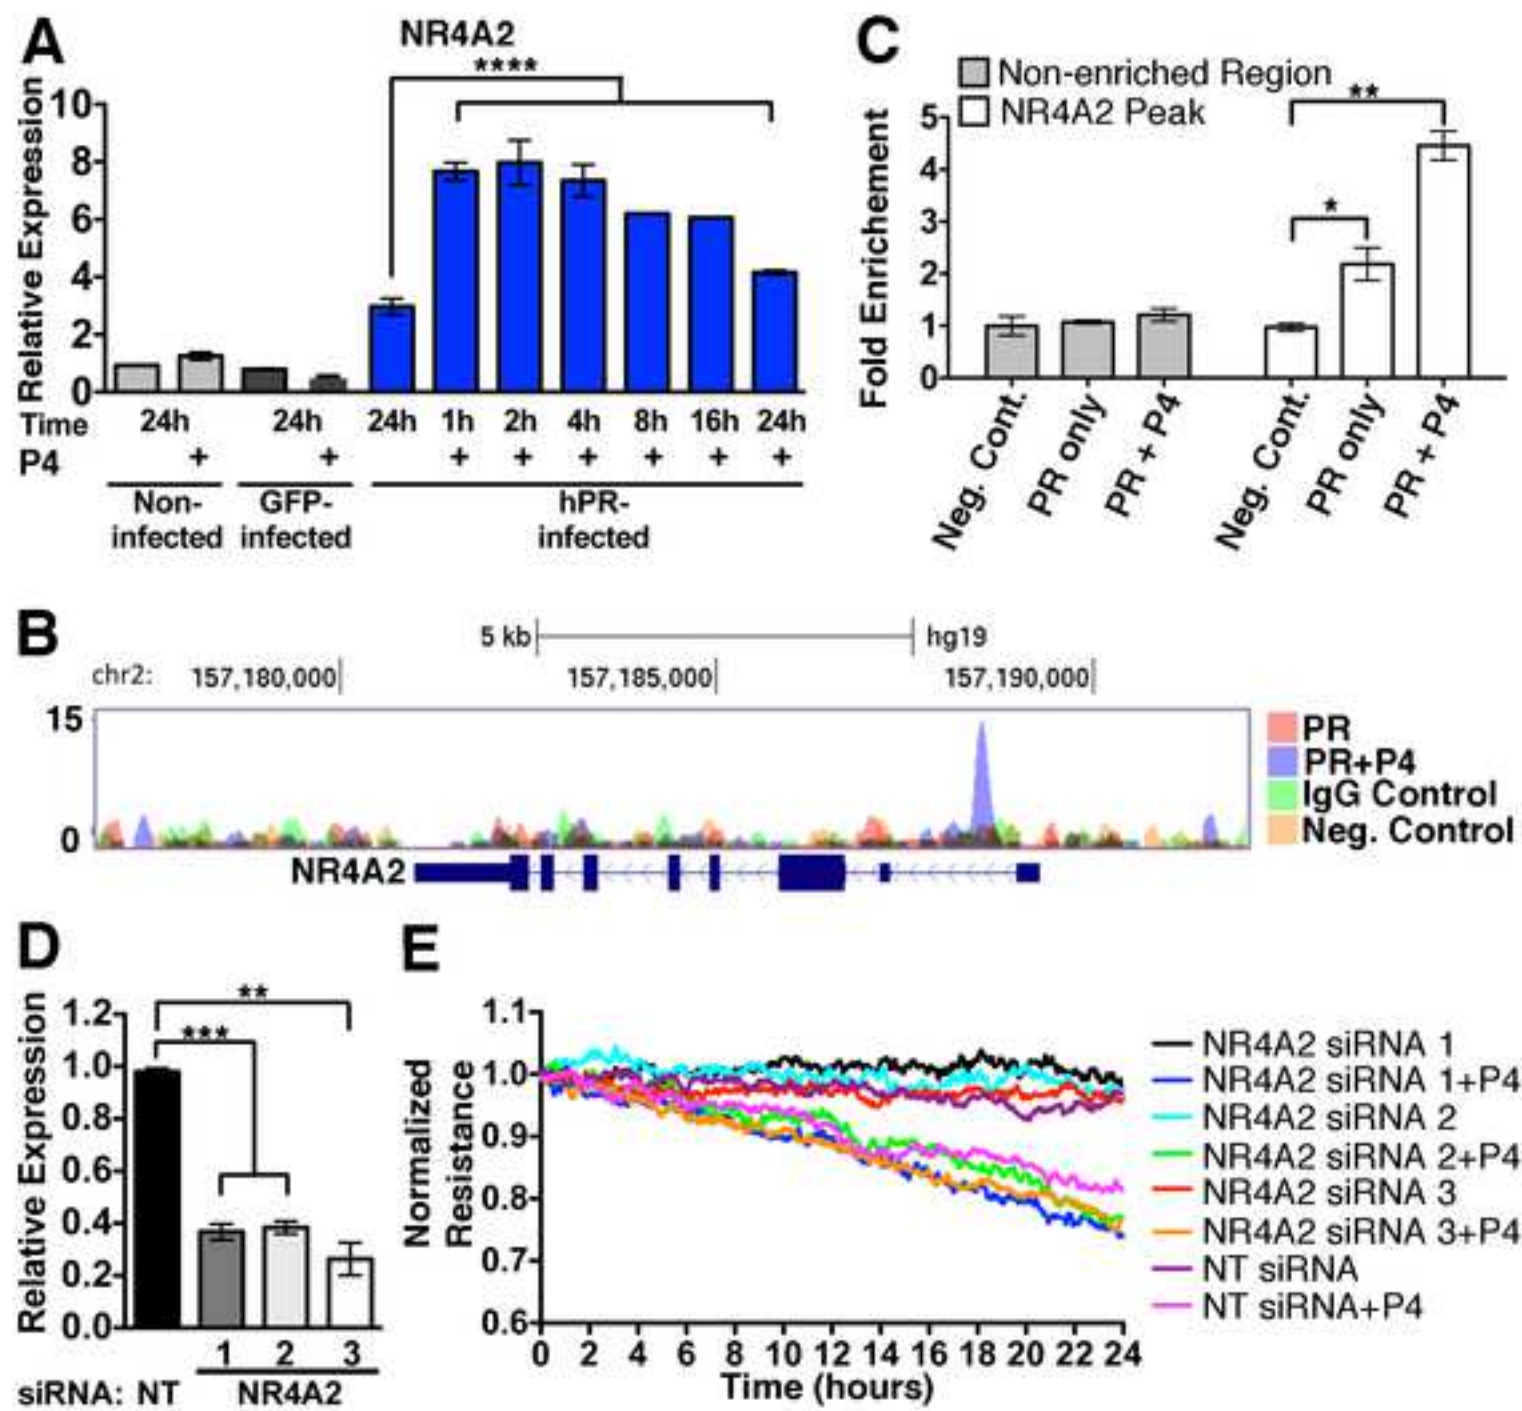

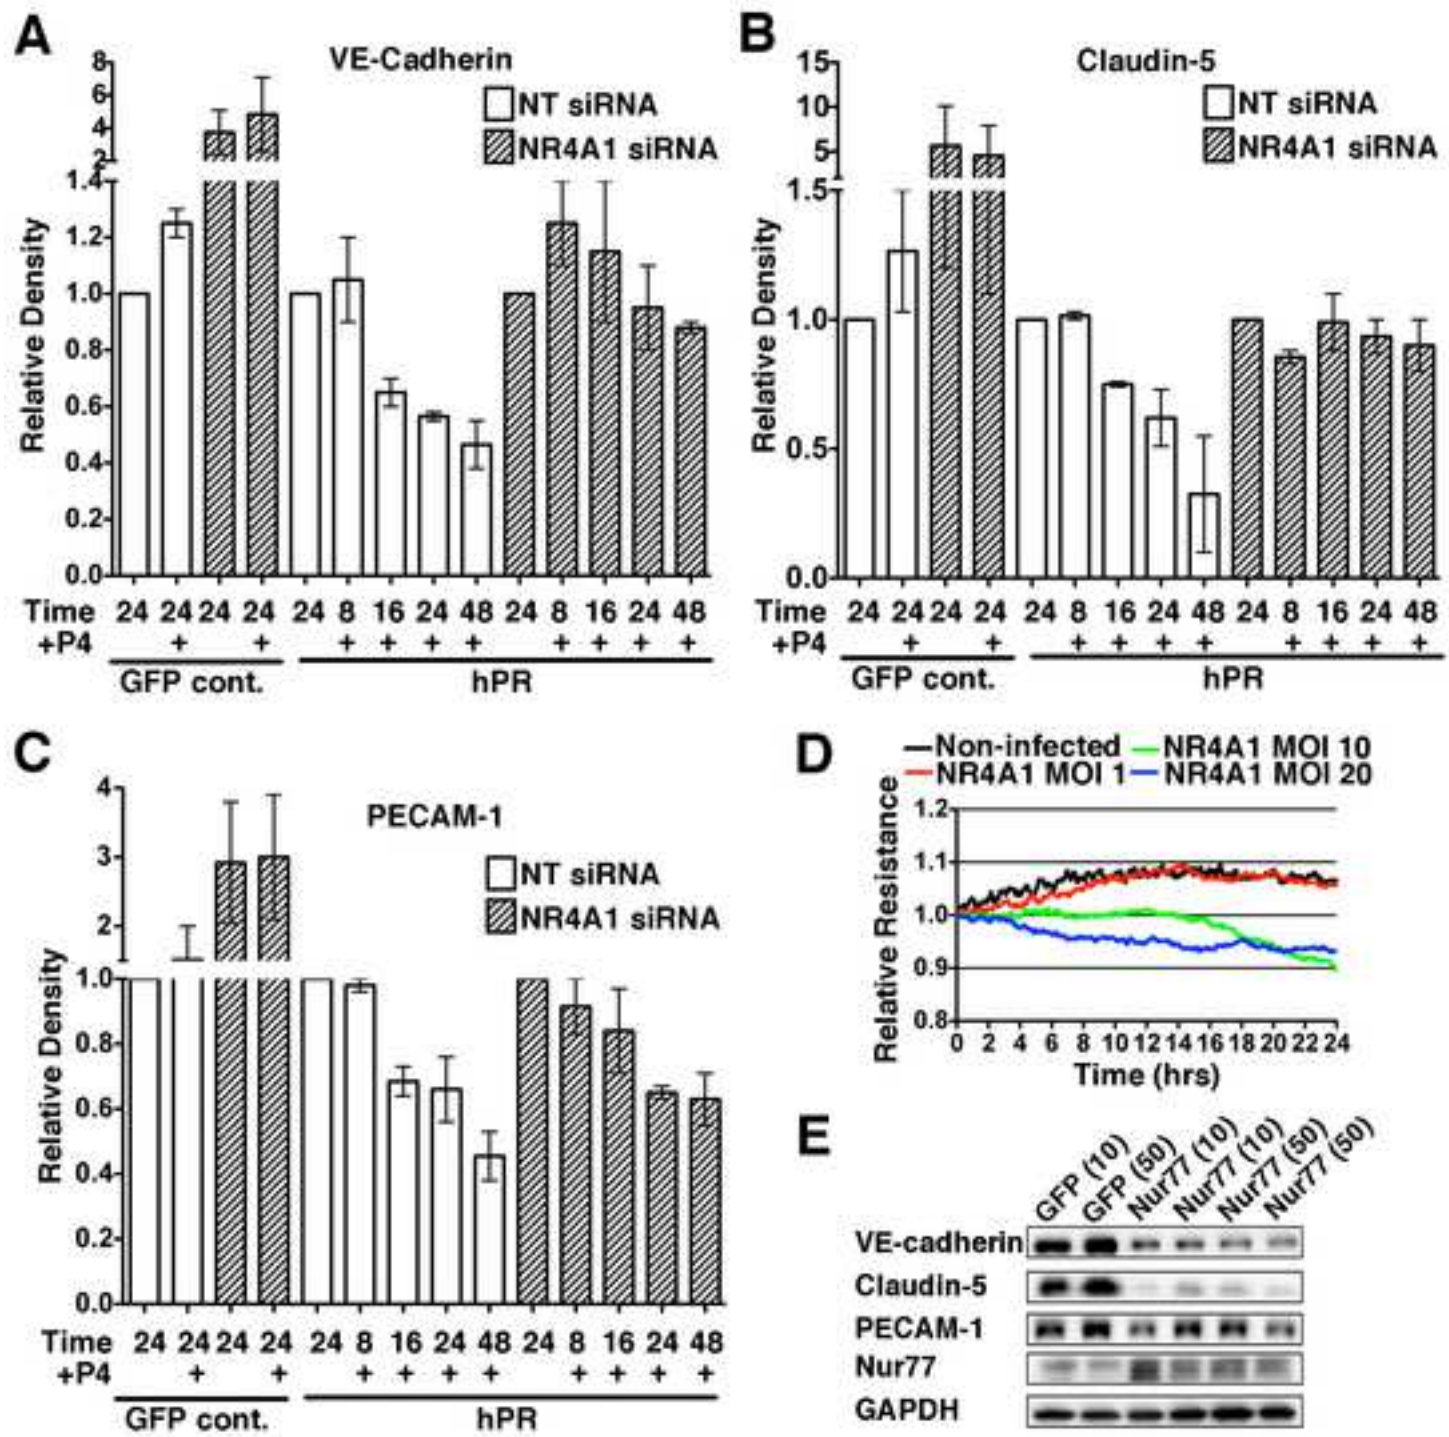

Supplement: NIHMS560383-supplement-02.pdf [file NIHMS560383-supplement-02.pdf]
